# Supplementary material for: First-principles study on ferromagnetism in 4H-SiC codoped with Al and Mn
Source: Royal Society of Chemistry journal article supplement (doi:10.1039/c8nj01171k), 2018-01-01
Supplement: c8nj01171k1.pdf [file c8nj01171k1.pdf]

## First-principles study on ferromagnetism in 4H-SiC codoped with Al and Mn

Long Lin,<sup>a</sup> Linghao Zhu,<sup>a</sup> Ruiqi Zhao,<sup>\*a</sup> Hualong Tao,<sup>b</sup> Jingtao Huang,<sup>a</sup> Yonghao Xu,<sup>c</sup>  
Zhanying Zhang<sup>a</sup>

<sup>a</sup> *Cultivating Base for Key Laboratory of Environment-Friendly Inorganic*

*Materials in Henan Province, School of Materials Science and Engineering, Henan*

*Polytechnic University, Jiaozuo 454000, China*

<sup>b</sup> *Liaoning Key Materials Laboratory for Railway, School of Materials Science and Engineering, Dalian Jiaotong*

*University, Dalian 116028, Liaoning Province, China*

<sup>c</sup> *School of Physics and Electronic Information Engineering, Henan Polytechnic*

*University, Jiaozuo 454000, China*

\*Author to whom correspondence should be addressed. zhaoruiqi@hpu.edu.cn.

### Contents:

1. Spatial spin density distribution in the stable configuration (0, 2);
2. Schematic structure of 4H-SiC used to define (Al, 2Mn, V<sub>Si</sub>)-codoped 4H-SiC;
3. The calculated results of (Al, 2Mn, V<sub>Si</sub>)-codoped 4H-SiC.

## 1. Spatial spin density distribution in the stable configuration (0, 2);

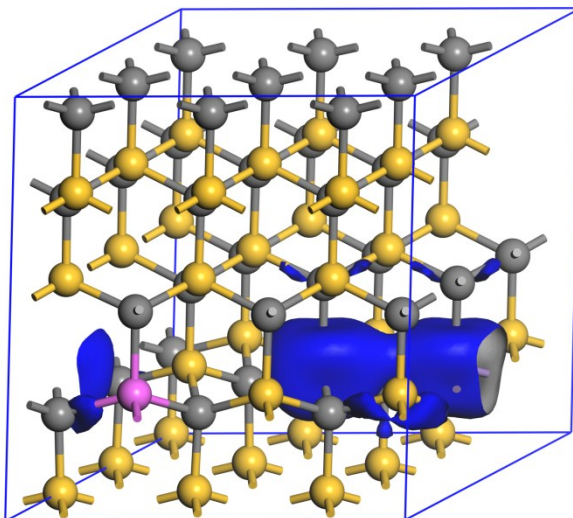

**Fig. S1** (Color online) Spatial spin density distribution in the stable configuration (0, 2). The isosurface is  $0.02 \text{ e}/\text{\AA}^3$ .

## 2. Schematic structure of 4H-SiC used to define (Al, 2Mn, $V_{\text{Si}}$ )-codoped 4H-SiC.

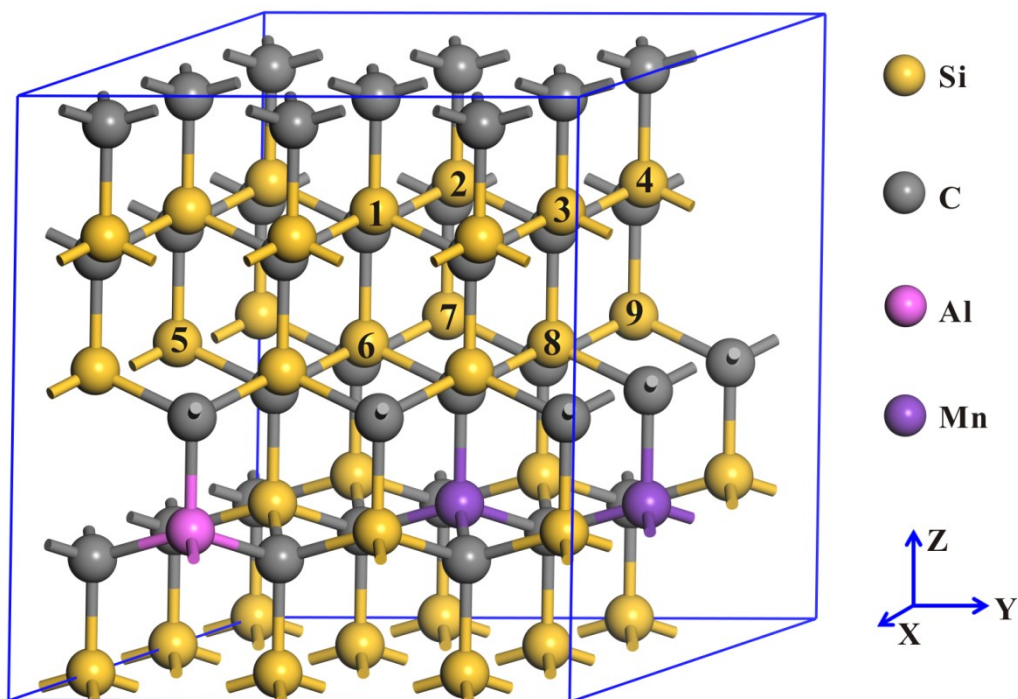

**Fig. S2** (Color online) Schematic structure used to define (Al, 2Mn,  $V_{\text{Si}}$ )-codoped 4H-SiC. Yellow, gray, pink, and purple spheres represent Si, C, Al and Mn atoms, respectively. Here, the positions of Si substituted by Al and the two Mn atoms are fixed while the positions substituted by  $V_{\text{Si}}$  are labelled by Arabic numerals varying from 1 to 9.

### 3. The calculated results of (Al, 2Mn, V<sub>Si</sub>)-codoped 4H-SiC.

Table S1. The optimized distance between Mn<sub>1</sub> and Mn<sub>2</sub> ( $d_{\text{Mn1-Mn2}}$ ), the energy difference  $\Delta E_d$  (meV) between FM and AFM states, the formation energies,  $E_f$  (eV) and the FM magnetic moments for Al ( $M_{\text{Al}}$ ) and total magnetic moments for Mn ( $M_{\text{Mn}}$ ) atoms are listed.

| Configurations | $d_{\text{Mn1-Mn2}}(\text{\AA})$ | $\Delta E_d$ (meV) | $E_f$ (eV) | $M_{\text{Al}}(\mu_B)$ | $M_{\text{Mn}}(\mu_B, \text{total})$ |
|----------------|----------------------------------|--------------------|------------|------------------------|--------------------------------------|
| 1              | 3.078                            | 45.0               | 13.01      | 0.00                   | 5.12                                 |
| 2              | 3.078                            | -32.3              | 12.91      | 0.04                   | 5.10                                 |
| 3              | 3.061                            | -68.9              | 13.03      | 0.02                   | 5.02                                 |
| 4              | 3.083                            | -436.6             | 12.83      | 0.02                   | 5.12                                 |
| 5              | 3.036                            | 40.5               | 12.31      | 0.02                   | 4.72                                 |
| 6              | 3.049                            | -105.9             | 12.36      | 0.02                   | 4.24                                 |
| 7              | 3.063                            | -161.3             | 13.10      | 0.04                   | 5.16                                 |
| 8              | 3.058                            | -65.6              | 11.90      | 0.02                   | 4.28                                 |
| 9              | 3.069                            | -957.0             | 13.00      | 0.02                   | 4.94                                 |

Note:  $\Delta E_d = E_{\text{FM}} - E_{\text{AFM}}$
